# Supplementary material
Source: Springer Nature journal article supplement (https://www.springermedizin.de/resource/supplementary/13051_2009_24_MOESM3_ESM.pdf/9669782)

**A**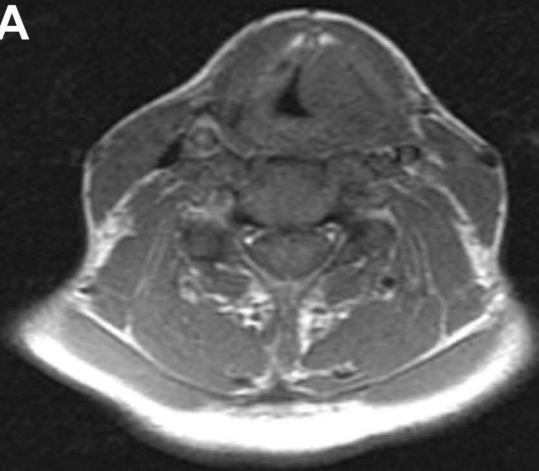**B**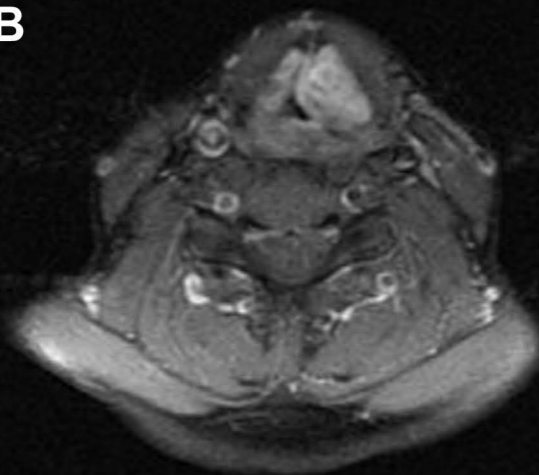**C**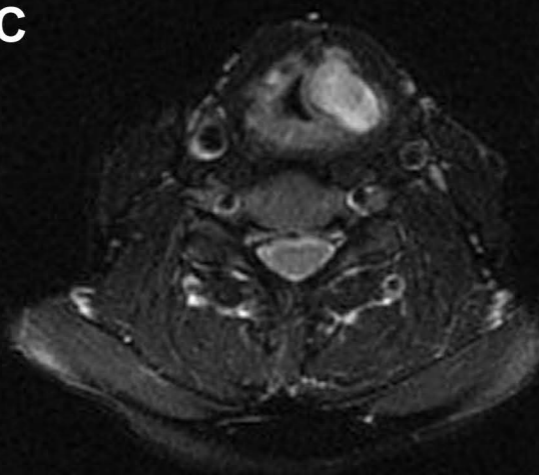

Supplement: MOESM3 [file 9669782]
